# A multimodal framework for detecting direct and indirect gene-gene interactions from large expression compendium

Lu Zhang<sup>1,†</sup>, Jia Xing Chen<sup>2,†</sup> and Shuai Cheng Li<sup>2\*</sup>

<sup>1</sup>Department of Computer Science, Hong Kong Baptist University, Kowloon, Hong Kong

<sup>2</sup>Department of Computer Science, City University of Hong Kong, Tat Chee Avenue, Kowloon, Hong Kong

Correspondence\*:  
Shuai Cheng Li  
scli@cityu.edu.hk

## 2 ABSTRACT

3 The fast accumulation of high-throughput gene expression data provides us an unprecedented  
4 opportunity to understand the gene interactions and prioritize disease candidate genes. However,  
5 these data are typically noisy and highly heterogeneous, complicating their use in constructing  
6 large expression compendium. Recent studies suggest that the collective expression pattern  
7 can be better modeled by Gaussian mixtures. This motivates our present work, which applies a  
8 Multimodal framework (MMF) to depict the gene expression profiles. MMF introduces two new  
9 statistics: Multimodal Mutual Information and Multimodal Direct Information. Through extensive  
10 simulations, MMF outperforms other approaches for detecting gene co-expressions or gene  
11 regulatory interactions, regardless of the level of noise or strength of interactions. In the principal  
12 component analysis for very large collections of expression data, the use of MMI enables more  
13 biologically meaningful spaces to be extracted than the use of Pearson correlation. The practical  
14 use of MMF is further demonstrated with three biological applications: 1. Prioritizing *KIF1A* as  
15 the candidate causal gene of hereditary spastic paraparesis from familial exome sequencing  
16 data; 2. Detecting *ANK2* as the 'hot genes' for autism spectrum disorders, derived from exome  
17 sequencing family based study; 3. Predicting the microRNA target genes based on both sequence  
18 and expression information.

19 **Keywords:** multimodal framework, data integration, direct information, gene-gene interactions, gene regulatory network

## 1 INTRODUCTION

20 A massive amount of biological data have been accumulated in the past decades through the widespread  
21 application of high-throughput technology in molecular biology. These data contain more valuable  
22 knowledge which may be overlooked by inspecting each dataset individually. The gene expression datasets,  
23 which are publicly available in several sites (such as Gene Expression Omnibus (GEO) Barrett et al. (2013),  
24 ArrayExpress Kolesnikov et al. (2015) and etc.), provide us an unprecedented opportunity to discover  
25 valuable information. Different from structuralized data, analysis for gene expression is a data-driven and

\*The authors wish it to be known that, in their opinion, the first two authors should be regarded as joint First Authors

26 unsupervised learning task. Integrating different data sources can enable us eliminate the issues caused  
27 by poor quality and incomplete training set. The analyses of large amount of gene expression collections  
28 have been applied in predicting gene functions Fehrmann et al. (2015), prioritizing disease candidate  
29 genes van Dam et al. (2015), predicting microRNA targets Gennarino et al. (2009, 2012), constructing  
30 gene co-expression network Lee et al. (2004), etc.

31 These analyses rely heavily on the accurate detection of gene-gene interactions from large expression  
32 compendium, several computational approaches have been developed for this purpose. Computational  
33 approaches typically define gene-gene interactions by gene co-expression; the rationale is that, when two  
34 genes demonstrate correlated expression patterns, they are likely to interact.

35 Pearson correlation followed by meta-analysis is widely employed to reconstruct gene co-expression  
36 network from large expression data. This approach benefits from its straightforward interpretation and  
37 computational efficiency. Lee et al. (2004) performs the first study to prove the reproducibility of  
38 co-expression relationship across multiple datasets by counting the significant gene correlations from  
39 3,924 microarrays. The co-expressed gene pairs, supported by multiple datasets, are strongly enriched in  
40 biological function. MEFIT Huttenhower et al. (2006) utilizes a scalable Bayesian framework to integrate  
41 the Z-scores that are transformed from Pearson correlations between gene pairs, and is proved to be superior  
42 to the other integration methods. However, Pearson correlation can only capture linear correlation, which  
43 is not always the case for gene-gene interactions. This has prompted the use of mutual information (MI)  
44 in the inference of gene-gene interactions. The MI of two genes is a measure of their mutual dependence  
45 which can detect both linear and nonlinear dependencies Brunel et al. (2010); Meyer et al. (2008); Luo  
46 et al. (2008). For gene expression data, MI is computed by discretization through B-spline smoothing Daub  
47 et al. (2004), or by assuming Gaussian distributions Margolin et al. (2006).

48 Although gene co-expression reveals the dependencies between genes, it cannot distinguish between the  
49 direct and transitive dependencies—the latter is often considered as false positives for gene regulatory  
50 relations as the regulators bind to their target genes physically. Many approaches have been proposed to  
51 remedy this. ARACNE Margolin et al. (2006) considers the lowest MI value among any triplet of genes as  
52 a transitive edge based on Data Processing Inequality. The CLR Faith et al. (2007) algorithm transforms  
53 the MI to Z-score to remove background promiscuous gene correlations. GENIE3 Huynh-Thu et al. (2010)  
54 creates a tree-based ensemble model for each target gene to predict and rank the potential regulatory links.  
55 TIGRESS Haury et al. (2012) proposes a robust and accurate method for stability selection to improve the  
56 feature selection in least angle regression for each target gene. If gene expression data follow a Gaussian  
57 distribution, transitive elements in the gene covariance matrix can be eliminated by using precision matrix,  
58 as demonstrated by MaxEnt Lezon et al. (2006) based on the maximum entropy principle.

59 The sample size of the dataset is an important factor affecting the accuracy of inferring the gene-gene  
60 interactions, as several studies indicated before. One approach to alleviate this issue is to integrate  
61 expression data from available databases. HOCTAR Gennarino et al. (2009) infers the microRNA targets  
62 by considering the expression correlations between microRNA host gene and its potential target genes,  
63 which are calculated by integrating 3,445 different microarray hybridization experiments from Affymetrix  
64 HGU133A. However, HOCTAR neglects the transitive effects, which may report the genes that co-express  
65 with the real targets rather than to be regulated by the microRNA. Though integrating multiple datasets  
66 increases the sample size, the data will be severely obstructed by the heterogeneity: the collected samples  
67 are produced from different tissues, by different platforms, by different RNA extraction methods, and with  
68 varying qualities.

69 Methods such as Pearson correlation followed by meta-analysis can relief the heterogeneous issue across  
70 datasets, but still are inane to the inner heterogeneity within each dataset. We note a related study with

71 the gene expressions of tumor tissues, which are often confounded by their surrounding normal tissues or  
72 mixed with different subclones Navin et al. (2011). To distinguish these tissues, TEMT Li and Xie (2013)  
73 models gene expression with Gaussian mixture models. We also note a result by Kim Kim et al. (2010)  
74 over the large expression compendium, where it found the majority of gene expressions follow multimodal  
75 distributions: 48.9% and 34.7% of probes should be modeled as for bi- and tri- modes distributions.  
76 Motivated by these results, we use Gaussian mixtures on our framework to infer gene interactions.  
77 Previous methods model the gene expressions according to their “global features”—following a common  
78 distribution. But actual situation is not always the case. Some genes merely express in a specific cellular  
79 condition or tissue Wang et al. (2014), they may be modeled by appropriate “local features”—following the  
80 combination of multiple distributions. To model the “local features”, we assume that the gene expressions  
81 are sampled from different distributions rather than independent and identically distributed random variables.  
82 Hence, we propose a Multimodal Framework (MMF) that depicts the large gene expression data explicitly  
83 by Gaussian mixture models. Under this framework, the correlations are evaluated more accurately  
84 through a new measure—Multimodal Mutual Information (MMI). MMF also allows a new measure  
85 called Multimodal Direct Information (MDI) to identify regulation relationship free from the influence of  
86 transitive correlations. These two measures form the basis of our framework to identify gene interactions  
87 from integrated large expression datasets.  
88 When comparing to the other methods for inferring gene-gene interactions, MMI and MDI demonstrate  
89 superior accuracy and noise tolerance according to the simulation results. We further successfully apply  
90 MMI and MDI to three biomedical problems and obtain encouraging results: 1. MMI identifies *KIF1A*  
91 as the causal gene of hereditary spastic paraparesis (HSP) correctly from familial exome sequencing data  
92 by detecting the strongest co-expression with the established disease casual genes; 2. MDI identifies  
93 *ANK2* as the ‘hot gene’ from exome sequencing familial study for autism spectrum disorders (ASDs);  
94 3. MDI predicts the targets of microRNAs transcribed from the intragenic regions accurately. These  
95 experiments demonstrate the effectiveness of MMF in identifying gene interactions from large gene  
96 expression compendium.

## 2 MATERIALS AND METHODS

### 97 2.1 Multimodal framework

98 The MMF is specifically designed for calculating gene-gene interactions from noisy and heterogeneous  
99 expression datasets. MMF considers the “local feature” under the assumption that the expression data of  
100 each gene are sampled from Gaussian mixture models rather than one Gaussian distribution (**Materials**  
101 **and methods**). MMI is first proposed to evaluate the co-expression between gene pairs based on Gaussian  
102 mixtures. We further implement MDI to eliminate transitive interactions according to maximum entropy  
103 principle (**Materials and methods** and **Supplementary note**), which shed light on the identification of  
104 regulatory interactions and master regulators. The key innovation of MMF is considering both “outer” and  
105 “inner” local features. The “outer” local feature refers to the local probability of expression profiles from  
106 the same mode; the “inner” local feature is the correlation of gene expressions in the same mode. Under the  
107 framework, we define a measure called MMI to capture the gene co-expression, and another called MDI to  
108 capture gene regulatory interactions. The entire framework of MMF is showed in Figure fig:Figure1.

### 109 2.2 Gene expression data integration

110 We collect gene expression profiles from GEO and choose the most comprehensive array platform  
111 HG U133 Plus 2.0 (**TableS1**); All of the samples are processed together to examine the performance of

112 MMF in the global network. Poor quality chips are removed through the `affyQCReport` package from  
113 Bioconductor. Likewise, GCRMA is utilized to extract the log scale expression profiles for each probe  
114 followed by quantile normalization. The intensity of probe smaller than two is regarded as missing value  
115 and imputed by `impute` package from Bioconductor. Some genes are annotated by multiple probes, their  
116 expression profiles are computed by averaging those probe expressions.

### 117 2.3 Determine the number of modes for each gene

118 We assume that the integrated expression data is an  $m \times n$  matrix,  $D = (d_{i,j})_{m \times n}$ , where each row  $i$   
119 (denoted  $D_{i,\bullet}$ ) represents a sample, and each column  $j$  (denoted  $D_{\bullet,j}$ ) represents the expression profiles of  
120 one gene across all the samples.

121 We now describe how MMF models the underlying distribution that gives rise to this expression data.  
122 First, we group the expression profiles of each gene into clusters, where each cluster is assumed to form a  
123 Gaussian distribution. The expression profiles of any gene pair are partitioned according to the Cartesian  
124 product of the clusters from the respective genes. Each partition follows bivariate Gaussian distribution.  
125 Denote the clusters of gene  $j$  as  $C_{j,1}, C_{j,2}, \dots, C_{j,c_j}$ , where  $c_j$  is the number of clusters for gene  $j$ . The  
126 clusters for each gene is determined by maximizing the total log-likelihood of the Gaussian distributions  
127 formed. The log-likelihood of expression profiles  $d_{i_1,j}, \dots, d_{i_2,j}$  ( $i_1 < i_2$ ) to construct a Gaussian distribution  
128 is computed as

$$\ln \mathcal{L}(i_1, i_2) = -\frac{i_2 - i_1 + 1}{2} \ln 2\pi - \frac{i_2 - i_1 + 1}{2} \ln \hat{\sigma}^2 - \frac{1}{2\hat{\sigma}^2} \sum_{i=i_1}^{i_2} (d_{i,j} - \hat{\mu}_{i_1, i_2})^2, \quad (1)$$

129 where  $\hat{\mu}_{i_1, i_2} = \frac{1}{i_2 - i_1 + 1} \sum_{i=i_1}^{i_2} d_{i,j}$  and  $\hat{\sigma}^2 = \frac{1}{i_2 - i_1 + 1} \sum_{i=i_1}^{i_2} (d_{i,j} - \hat{\mu}_{i_1, i_2})^2$ . Our aim is to partition the data,  
130  $d_{1,j}, \dots, d_{m,j}$ , into distributions such that the sum of log-likelihoods from all the distributions is maximized.  
131 This can be solved using dynamic programming as follows.

132 Without loss of generality, we assume the expression profiles of gene  $j$  are sorted; that is,  $d_{1,j} \leq d_{2,j} \leq$   
133  $\dots \leq d_{m,j}$  (it is clear that such a sorting can be performed very efficiently).

134 Let  $T(i, k)$  denote the maximum likelihood by clustering the data  $d_{1,j} \leq d_{2,j} \leq \dots \leq d_{i,j}$  into  $k$  clusters.  
135 Then, the following recurrence relations can be formulated,

136

$$T(i, k) = \begin{cases} \max_{1 \leq t < i} \{T(t, k-1) + \ln \mathcal{L}(t+1, i)\}, & k \geq 2, i \geq 2 \\ \ln \mathcal{L}(1, i), & k = 1, i > 1 \\ -\infty, & \text{otherwise} \end{cases} \quad (2)$$

137 Hence, the maximum  $T(i, k)$  and its corresponding clusters can be calculated through dynamic  
138 programming for a given  $k$ .

### 139 2.4 Models for expression profiles of a single gene

140 We assume a random variable  $X_j$  for the expression of gene  $j$ . Following our framework,  $X_j$  is  
141 decomposed into  $c_j$  Gaussian random variables, denoted  $X_{j,1}, \dots, X_{j,c_j}$ . Denote the density function for  
142 cluster  $C_{j,k}$  as  $g_{X_{j,k}}(x)$ ,  $1 \leq k \leq c_j$ . Then, the expression profiles for gene  $j$  is distributed according to  
143 the density function

$$f_{X_j}(x) = \sum_{k=1}^{c_j} \pi_{j,k} g_{X_{j,k}}(x), \quad (3)$$



144 where

$$\pi_{j,k} = \frac{1}{m} \sum_{a=1}^m B(d_{a,j} \in C_{j,k}) \quad (4)$$

145 is the proportion of samples in cluster  $C_{j,k}$ ; here,  $B$  denotes Boolean function.

146 It is possible to introduce a notation of entropy for each gene whose expression profiles follow Gaussian

147 mixture models:

$$\begin{aligned} & MEntropy(X_j) \\ &= - \sum_{k=1}^{c_j} \int \pi_{j,k} g_{X_{j,k}}(x_j) \log \pi_{j,k} g_{X_{j,k}}(x_j) dx_j \\ &= - \sum_{k=1}^{c_j} [\pi_{j,k} \log \pi_{j,k} \int g_{X_{j,k}}(x_j) dx_j + \int \pi_{j,k} g_{X_{j,k}}(x_j) \log g_{X_{j,k}}(x_j) dx_j] \\ &= - \sum_{k=1}^{c_j} \pi_{j,k} \log \pi_{j,k} + \sum_{k=1}^{c_j} \pi_{j,k} \int g_{X_{j,k}}(x_i, x_j) \log g_{X_{j,k}}(x_j) dx_j \\ &= - \sum_{k=1}^{c_j} \pi_{j,k} \log \pi_{j,k} + \sum_{k=1}^{c_j} \pi_{j,k} \frac{1}{2} \log(2\pi e \sigma_k^2) \end{aligned} \quad (5)$$

148 in which,  $\sigma_k$  denotes the standard deviation for the  $k$ th Gaussian distribution.  $MEntropy$  is used to  
149 normalize MMI and MDI to  $[0, 1]$  in Section Sec:backgroundnoise.

## 150 2.5 Multimodal mutual information

151 Computing MMI consists of four major steps: first, the expression profiles for each gene are clustered by  
152 assuming that each cluster is Gaussianly distributed; second, “outer” MI is computed by aggregating the  
153 Kullback-Leibler divergence from the discretized gene expression profiles; third, “inner” MI is calculated  
154 for each cluster formed by any two genes; fourth, the MMI of two genes is calculated by aggregating the  
155 “outer” and “inner” MIs across all the associated clusters.

## 156 2.6 Models for expression profiles of gene pairs

157 We capture the relations between expression profiles of two genes by bivariate Gaussian mixture models.  
158 Given the expression profiles of gene  $i$  and  $j$  ( $1 \leq i, j \leq n$ ), we partition the data into  $c_i \times c_j$  bins; that  
159 is, we take the Cartesian product of the clusters for gene pair  $i$  and  $j$ . We model each bin as a bivariate  
160 Gaussian distribution, and denote the density function of each distribution as  $g_{X_{i,k_1}, X_{j,k_2}}(x_i, x_j)$ , where  
161  $1 \leq k_1 \leq c_i$  and  $1 \leq k_2 \leq c_j$ . The expressions of genes  $i$  and  $j$  is a mixture models with joint density  
162 function

$$\begin{aligned} f_{X_i, X_j}(x_i, x_j) &= \sum_{k_1=1}^{c_i} \sum_{k_2=1}^{c_j} \pi^{(i,k_1),(j,k_2)} g_{X_{i,k_1}, X_{j,k_2}}(x_i, x_j), \\ \pi^{(i,k_1),(j,k_2)} &= \frac{1}{m} \sum_{a=1}^m B(d_{a,i} \in C_{i,k_1}) B(d_{a,j} \in C_{j,k_2}), \end{aligned} \quad (6)$$

163 where  $\pi^{(i,k_1),(j,k_2)}$  is the proportion of samples shared by cluster  $C_{i,k_1}$  and  $C_{j,k_2}$ . We assume that the  
164 marginal distributions of  $g_{X_{i,k_1}, X_{j,k_2}}(x_i, x_j)$  are  $g_{X_{i,k_1}}(x_i)$  and  $g_{X_{j,k_2}}(x_j)$ . Hence, the only parameter left

165 to be estimated is the covariance matrix (correlation matrix). Denote the covariance between variable  $X_{i,k_1}$   
 166 and  $X_{j,k_2}$  as  $Cov(X_{i,k_1}, X_{j,k_2})$ . Notice that we cannot utilize the covariance of shared expression profiles  
 167 between  $C_{i,k_1}$  and  $C_{j,k_2}$ , we need to guarantee the marginal distributions of each bin are invariant.

## 168 2.7 Covariance matrix estimation

169 We calculate the covariance matrix  $S^I$  to capture the covariance in each bin, whose entry  $S_{i,j}^I(k_1, k_2)$   
 170 denotes the covariance between two variables  $X_{i,k_1}$  and  $X_{j,k_2}$ . We first construct  $g'_{X_{i,k_1}, X_{j,k_2}}(x_i, x_j)$  that  
 171 according to the expression profiles shared between  $C_{i,k_1}$  and  $C_{j,k_2}$ . Assuming that  $g_{X_{i,k_1}, X_{j,k_2}}(x_i, x_j) \sim$   
 172  $\mathcal{N}(\mu, S_{i,j}^I(k_1, k_2))$  and  $g'_{X_{i,k_1}, X_{j,k_2}}(x_i, x_j) \sim \mathcal{N}(\mu', S_{i,j}^I(k_1, k_2)')$ , we can calculate  $S_{i,j}^I(k_1, k_2)$  by  
 173 minimizing these Kullback-Leibler divergence between the two distributions by Eq. eqn:opt:

$$\begin{aligned} & \arg \min_{S_{i,j}^I(k_1, k_2)} \{D_{KL}(g_{X_{i,k_1}, X_{j,k_2}}(x_i, x_j) || g'_{X_{i,k_1}, X_{j,k_2}}(x_i, x_j))\} \\ &= \arg \min_{S_{i,j}^I(k_1, k_2)} \frac{1}{2} (tr(S_{i,j}^I(k_1, k_2)'^{-1} S_{i,j}^I(k_1, k_2)) \\ &+ (\mu' - \mu)^T S_{i,j}^I(k_1, k_2)'^{-1} (\mu' - \mu) - k - \log(\frac{|S_{i,j}^I(k_1, k_2)|}{|S_{i,j}^I(k_1, k_2)'|})) \\ &= \arg \min_{S_{i,j}^I(k_1, k_2)} \{tr(S_{i,j}^I(k_1, k_2)'^{-1} S_{i,j}^I(k_1, k_2)) - \log |S_{i,j}^I(k_1, k_2)|\} \end{aligned} \quad (7)$$

## 174 2.8 Aggregating the “outer” and “inner” mutual information

175 After calculating the mixture distributions and their parameters, we need to aggregate MI from each bin  
 176 to detect the interactions between two genes. By assuming that  $X_{i,k}$  follows a Gaussian distribution, the  
 177 mutual information between  $X_i$  and  $X_j$  is estimated as

$$\begin{aligned} & MMI(X_i, X_j) \\ &= \sum_{k_1=1}^{c_i} \sum_{k_2=1}^{c_j} \pi_{(i,k_1), (j,k_2)} \log \frac{\pi_{(i,k_1), (j,k_2)}}{\pi_{i,k_1} \pi_{j,k_2}} \\ &+ \sum_{k_1=1}^{c_i} \sum_{k_2=1}^{c_j} \pi_{(i,k_1), (j,k_2)} \frac{1}{2} \log \frac{S_{i,i}^I(k_1, k_1) S_{j,j}^I(k_2, k_2)}{\begin{vmatrix} S_{i,i}^I(k_1, k_1) & S_{i,j}^I(k_1, k_2) \\ S_{i,j}^I(k_1, k_2) & S_{j,j}^I(k_2, k_2) \end{vmatrix}} \\ &= MMI^O(X_i, X_j) + MMI^I(X_i, X_j) \end{aligned} \quad (8)$$

178 in which  $|\bullet|$  denotes matrix determinant. From Eq. eqn:MMI, we observe that MMI is calculated by  
 179 aggregating two types of mutual information:  $MMI^O(X_i, X_j)$ , which we refer to as “outer” mutual  
 180 information, and  $MMI^I(X_i, X_j)$ , which we refer to “inner” mutual information. The “outer” mutual  
 181 information is calculated by discretizing the continuous expression profiles into small bins, and is basically  
 182 the same as the MI calculated for relevance networks (Butte and Kohane, 2000). The “inner” mutual  
 183 information is the weighted aggregation of mutual information for each bin.

184 **2.9 Multimodal Direct Information**

185 To remove transitive interactions between any gene pairs, we introduce a measure—Multimodal Direct  
 186 Information—which is enhanced from MMI based on maximum entropy principle. The “outer” part of  
 187 MDI,  $MDI^O$ , is modified from the direct-coupling analysis (DCA) (Morcos, Pagnani, Lunt, Bertolino,  
 188 Marks, Sander et al., 2011), that identifies the co-evolution between protein residuals. The inner part of  
 189 MDI,  $MDI^I$ , is similar to  $MMI^I$ , but with the covariance matrix  $S^I$  exchanged with a precision matrix,  
 190 while ensuring the marginal distributions are invariant.

191 **2.10 “Outer” MDI**

192 DCA has been successfully applied to identify co-evolved protein residuals by removing false transitive  
 193 connections.  $MDI^O$  is based on a similar technique as DCA, but modified for gene expression data. First,  
 194  $MDI^O$  introduces *pseudosamples*  $\lambda$  in each bin to avoid insufficient samples. Let *pseudosamples* be  
 195 uniformly distributed across all the bins. Then,  $\pi_{j,k}$  and  $\pi_{(i,k_1),(j,k_2)}$  are rewritten as:

$$\begin{aligned} \pi_{j,k} &= \frac{1}{m + \lambda} \left( \frac{\lambda}{c_j} + \sum_{a=1}^m \mathbf{B}(d_{a,j} \in C_{j,k}) \right) \\ \pi_{(i,k_1),(j,k_2)} &= \frac{1}{m + \lambda} \left( \frac{\lambda}{c_i c_j} + \sum_{a=1}^m \mathbf{B}(d_{a,i} \in C_{i,k_1}) \mathbf{B}(d_{a,j} \in C_{j,k_2}) \right) \end{aligned} \quad (9)$$

196 the covariance between any pair of genes  $(i, j)$  for the bin  $(k_1, k_2)$  in  $MDI^O$  is given by

$$S_{i,j}^O(k_1, k_2) = \pi_{(i,k_1),(j,k_2)} - \pi_{i,k_1} \pi_{j,k_2} \quad (10)$$

197 **2.11 “Inner” MDI**

198 Rather than normalizing each term as in  $MMI^I$  by the number of samples grouped in the particular bin,  
 199  $MDI^I$  introduces an “inner” *pseudocount* to provide the clusters for each gene the same sample size. For  
 200 the  $k$ th bin of gene  $j$ , we denote the average expression of the samples in  $C_{j,k}$  is  $\overline{C_{j,k}}$ . For each sample  
 201 which is not a member of the cluster  $k$  ( $X_j^k$ ), its value is replaced with  $\overline{C_{j,k}}$  in  $MDI^I$ . The covariance for  
 202 the bin  $k_1, k_2$  of gene  $i, j$  is

$$S_{i,j}^I(k_1, k_2)' = Cov(X_i^{k_1}, X_j^{k_2}) \quad (11)$$

203 The same as MMI,  $S_{i,j}^I(k_1, k_2)'$  is further transformed to  $S_{i,j}^I(k_1, k_2)$  according to Eq. eqn:opt.

204 **Precision matrix**

205 In order to calculate the precision matrix more efficiently and accurately, we introduce a regularization  
 206 parameter  $\eta$ . The precision matrix  $\Theta$  is calculated as

$$\begin{aligned} \Theta^O &= (S^O S^{O'} + \eta^O Id)^{-1} S^O \\ \Theta^I &= (S^I S^{I'} + \eta^I Id)^{-1} S^I \end{aligned} \quad (12)$$

207 **2.12 Aggregate “outer” and “inner” Direct information**

208 Finally, MDI is calculated by aggregating the  $MDI^O(i, j)$  and  $MDI^I(i, j)$  across all the bins.

$$\begin{aligned} MDI^O(X_i, X_j) &= \sum_{1 \leq k_i \leq c_i, 1 \leq k_j \leq c_j} |\Theta_{i,j}^O(k_1, k_2)| \\ MDI^I(X_i, X_j) &= \sum_{1 \leq k_i \leq c_i, 1 \leq k_j \leq c_j} |\Theta_{i,j}^I(k_1, k_2)| \\ MDI(X_i, X_j) &= MDI^O(X_i, X_j) + MDI^I(X_i, X_j) \end{aligned} \quad (13)$$

209 **2.13 Background noise elimination**

210 MMI and MDI can be further adjusted to eliminate the background influence, or noise  
 211 (Eq.eqn:backgroundnoise). After that, we rescale MMI and MDI to  $[0, 1]$  by dividing them with their  
 212 upperbound  $\max\{MEntropy(X_i), MEntropy(X_j)\}$  (Eq.eqn:maximum). In this paper, we perform this  
 213 step by default, and simply write  $MMI_{adj}$  and  $MDI_{adj}$  as  $MMI$  and  $MDI$ .

$$\begin{aligned} MMI_{adj}^O(X_i, X_j) &= MMI^O(i, j) - \frac{MMI^O(\cdot, j)MMI^O(i, \cdot)}{MMI^O(\cdot, \cdot)} \\ MMI_{adj}^I(X_i, X_j) &= MMI^I(i, j) - \frac{MMI^I(\cdot, j)MMI^I(i, \cdot)}{MMI^I(\cdot, \cdot)} \\ MDI_{adj}^O(X_i, X_j) &= MDI^O(i, j) - \frac{MDI^O(\cdot, j)MDI^O(i, \cdot)}{MDI^O(\cdot, \cdot)} \\ MDI_{adj}^I(X_i, X_j) &= MDI^I(i, j) - \frac{MDI^I(\cdot, j)MDI^I(i, \cdot)}{MDI^I(\cdot, \cdot)}. \end{aligned} \quad (14)$$

214 and

$$\begin{aligned} MMI_{adj}(X_i, X_j) &= \frac{MMI_{adj}^O(i, j) + MMI_{adj}^I(i, j)}{\max(MEntropy(X_i), MEntropy(X_j))} \\ MDI_{adj}(X_i, X_j) &= \frac{MDI_{adj}^O(i, j) + MDI_{adj}^I(i, j)}{\max(MEntropy(X_i), MEntropy(X_j))}. \end{aligned} \quad (15)$$

**3 RESULTS**

215 **3.1 Simulation for evaluating MMI and MDI**

216 We follow closely the procedures in SIMON and TIBSHIRANI (2012) for simulation. We sample the  
 217 gene pair expression profiles from bivariate Gaussian mixture distributions (with two modes) with the  
 218 covariance changing from 0.1 to 0.9. The empirical distribution is constructed by the same procedure,  
 219 implying the same distribution but with randomly assigned covariances.

220 We evaluate eight measures besides MMI: 1. Pearson correlation; 2. Spearman correlation; 3. Kendall’s rank  
 221 correlation; 4. Mutual information based on kernel density estimation (MI(KDE)); 5. Mutual information  
 222 based on B-spline (MI(bspline), with 10 partitions for each gene); 6. Maximal information coefficient  
 223 (MIC); 7. Maximum Asymmetry Score (MAS); 8. Maximum Edge Value (MEV). These measures are  
 224 evaluated by their power, that is, the proportion of simulations exceed the top 5% correlations from the  
 225 empirical distributions. To evaluate the noise tolerance of these correlation measures, we introduce uniform  
 226 distributed noises weighted by  $\frac{\omega}{\kappa}$  to the simulated expression profiles, where “ $\omega$ ” presents the amount of

227 noise and “ $\kappa$ ” denotes the noise level. We assign “ $\omega$ ” to a constant value 3 and set “ $\kappa$ ” to change from 0  
228 to 3 in the simulations. We also evaluate MMI with different cluster numbers to assess its sensitivity to  
229 clustering error.

230 We test MDI against five famous approaches for inferring regulatory interactions: ARACNE, CLR, GENIE3,  
231 MaxEnt and TIGRESS. In order to explicitly reflect the nature of direct interaction, we construct a tree  
232 structure, in which each node has only one parent (except the root) and merely directly interacts with  
233 its parent. In other words, the expression profiles of offsprings are totally determined by their parents.  
234 The expression profile for each node is sampled from a Gaussian mixture models with two modes. The  
235 joint distribution of a parent and one of its offsprings is a bivariate Gaussian distribution with specified  
236 covariance. The area under ROC (AUC) is applied to evaluate the methods’ performances. The involved  
237 noise signals are the same as those applied for the simulations for MMI.

### 238 3.2 Simulation results for MMI

239 We perform 1000 simulations to construct empirical distributions. MMI obtains higher powers than the  
240 other measures in all the simulations (Figure fig:Figure2), regardless of the magnitude of covariance or noise  
241 signals exist. MMI explicitly groups the samples for each gene into two modes followed by aggregating  
242 four bins together, where the correlation for each bin is calculated independently. This partitioning strategy  
243 makes the expression profiles for each bin follow a Gaussian distribution, which makes MMI easier to  
244 capture their correlations.

245 It is critical to lessen the influence of noise that may introduce the false positive results. By considering  
246 the “local feature”, MMI has better noise tolerance than other measures for uniform distributed noise. The  
247 noise is not always uniformly distributed across different studies or platforms. When heavy noise affects  
248 only a particular proportion of expression profiles, MMI tolerates the noises as they are usually grouped  
249 into isolate bins as the second bin illustrated in Figure fig:Figure1.

250 The second best method is MI(bspline), a non-parametric method which approximates the probabilistic  
251 density function by discretizing the continuous expressions into bins. While MI(bspline) seems to capture  
252 the information of  $MMI^O$ , but neglects the correlation in each bin. The other MI estimation, MI(KDE),  
253 utilizes Gaussian kernel to approximate the entire distribution to a Gaussian mixture models. The measure  
254 is demonstrably robust, but has an issue with efficiency—making it difficult to be applied to large expression  
255 compendium. Two rank based statistics, Spearman’s rank correlation coefficient and Kendall’s rank  
256 correlation, perform acceptable for high variance, but are found lacking when the covariance is small.

257 Considering MMI’s sensitivity to errors in terms of the cluster number for each gene, we assign different  
258 cluster number, from 2 to 5, on a Gaussian mixtures of two modes. We denote these MMI instances  
259 as MMI(2), MMI(3), MMI(4) and MMI(5). The results are as demonstrated in Figure fig:Figure3. As  
260 expected, MMI(2) performs the best in all cases. The performance deteriorates as the cluster number  
261 deviates further from the true value. This indicates that the correctness in the number of cluster is crucial  
262 to MMI’s performance. However, we note even the performance of MI(5) is comparable to the other  
263 measures’.

### 264 3.3 Simulation results for MDI

265 We simulate five tree structures, respectively of 10, 20, 50, 100 and 200 nodes. For each tree structure,  
266 we define a spectrum of covariances from weak to strong (0.1, 0.2, 0.4, 0.6 and 0.8), as well as a uniformly  
267 distributed noise. When noise is neglected, MDI consistently performs the best (Table 1 (a), 2 (a), 3 (a), 4  
268 (a), 5 (a)). This advantage is very significant in the case of small covariance (0.1) with large number of  
269 nodes (200), where the AUC of MDI is 15.7% higher than the second best method, that is, CLR. MDI



270 performs the best in 69 out of 75 simulations (92%). The 6 cases where MDI does not achieve the best  
271 result are the cases of high noise level, in which ARACNE or CLR show better performance (Table 1  
272 (c), 2 (c), 5 (b), 5 (c)). However, the AUC values of MDI remain comparable in these cases. We note  
273 that the three MI-based methods, MDI, ARACNE and CLR, to perform better than MaxEnt, GENIE3  
274 and TIGRESS in general, which suggests that MI-based methods may be more appropriate for capturing  
275 regulatory relationship.

### 276 3.4 Transcriptome components analysis for large expression compendium

277 Recently, Fehrmann *et al.* Fehrmann et al. (2015) propose a new perspective that the transcriptome  
278 components, as an underlying regulatory factor, can influence a batch of target gene expressions. The  
279 transcriptome components are calculated by principal component analysis on a correlation matrix, each of  
280 them capture a proportion of variance in the correlation space. The correlation matrix used in their study is  
281 computed with Pearson correlation. In this experiment, we compute a correlation matrix with MMI, and  
282 examine if the matrix could result in similar, or better results.

283 We evaluate the transcriptome components with Cronbach's  $\alpha$  value; transcriptome components with  
284 the values larger than 0.7 are generally considered as high quality ones and can be used to predict gene  
285 functions in the future. We further evaluate the biological function enrichment of principal components by  
286 grouping genes' coefficients according to MSigDB Subramanian et al. (2005). The gene set enrichment  
287  $Z$ -score is computed by comparing the coefficients between the genes belonging and not belonging to  
288 the particular function by two-sample  $t$ -test. These TCs are regarded as enriched in a function term if the  
289  $p$ -values are less than 0.05, after 10,000 simulations.

290 The results are as shown in Figure fig:Figure4. Using the matrix obtained from MMI, we find 657  
291 transcriptome components with high quality, in which 650 transcriptome components are enriched in  
292 at least one biological function in MSigDB. On the other hand, for the matrix obtained from Pearson  
293 correlation, the corresponding values are only 379 and 369. Thus, the use of MMI achieves nearly twice  
294 functional TCs than Pearson correlation. These functional transcriptome components can be further used to  
295 predict potential gene functions.

### 296 3.5 Apply to the exome sequencing for familial Mendelian disorders

297 Exome sequencing has been widely applied in identifying disease causal genes in the families affected  
298 by rare Mendelian disorders. However, it is a formidable task to pinpoint the causal one from very large  
299 amount of candidate genes. Erlich *et al.* Erlich et al. (2011) propose a novel method to remove meaningless  
300 genes by disease network analysis, working under the assumption that the disease causal gene should share  
301 biological functions with the other established genes of the disease. After bioinformatics analysis, there  
302 remains 15 candidate genes to be determined. Instead of utilizing interactions from databases such as Gene  
303 Ontology, KEGG pathway, we propose to evaluate gene-gene interactions by their co-expressions. We  
304 remove five genes that are missing in the Affymetrix HG U133A and calculate the average co-expression  
305 for each candidate gene with the ten established genes (**Supplementary note**) associated with HSP by  
306 MMI. Among the 10 candidate genes, the causal gene *KIF1A* is the only one significantly co-expresses  
307 with established genes ( $FDR < 0.05$ ) after 10,000 simulations (Figure fig:Figure5).

### 308 3.6 Apply to *de novo* mutations to identify the 'hot gene'

309 *De novo* mutations have been proven to be associated with many neurodevelopment disorders Iossifov  
310 et al. (2014); Fromer et al. (2014), especially for schizophrenia and ASDs. These genes with *de novo*  
311 mutations do not act individually, they are enriched in the same protein-protein interactions, gene ontology

312 term or regulatory network De Rubeis et al. (2014). We apply MDI to identify the ‘hot gene’, which  
313 organize the other genes in the network. We construct the directly interaction network by involving 33  
314 candidate genes (**Supplementary note**) identified in the latest family based study of ASDs De Rubeis et al.  
315 (2014) (with TADA He et al. (2013)  $FDR < 0.1$ ). MDI identifies *ANK2* as the ‘hot gene’, with the most  
316 connections with the other genes (Figure fig:Figure6).

317 *ANK2* has been detected to contain recurrent *de novo* mutations recently Willsey et al. (2013), and is  
318 one of the five ‘high-confidence’ ASDs candidate genes (the other four are *CHD8*, *DYRK1A*, *GRIN2B*,  
319 *SCN2A*). The expression of *ANK2* peaks slightly during mid-fetal development, which is the crucial time  
320 for ASDs risk. *ANK2*’s expression closely matches that of many other ASDs candidate genes, including  
321 *SCN2A* Willsey et al. (2013). In 1991, a study conducted by Kordeli and Bennett Kordeli and Bennett (1991)  
322 finds that knockout mice’s *ANK2* may lead to their lack of brain structures called the corpus callosum—a  
323 symptom which is likely related to ASDs; about one-third of the patients with corpus callosum are also  
324 affected by ASDs. These evidences strongly suggests to us that MDI may have identified the key gene in  
325 ASDs; *ANK2* may play a key role in ASDs pathogenesis.

### 326 **3.7 MicroRNA targets prediction**

327 We have noticed that, in HOCTAR, the microRNA targets is predicted by jointly considering the sequence  
328 feature and expression correlation between targets and microRNA host gene. But it may produce false  
329 targets due to their functional similarity with the real targets. This may result in their co-expression with  
330 each other. In HOCTAR, the Pearson correlation can barely distinguish transitive co-expression and direct  
331 regulation. In this test, we do a comparison between MDI and Pearson correlation used in HOCTAR as  
332 well as other three sequence-based prediction software-TargetScan Lewis et al. (2005), miRnada John et al.  
333 (2004) and PicTar Krek et al. (2005). To remove the false positives, we extract the putative targets that are  
334 confirmed by at least two of the three sequence-based software mentioned. The intragenic microRNAs  
335 and their host genes are derived from miRIAD Malone et al. (2013). The validated microRNA-target pairs  
336 used as benchmark are collected by literature search (**TableS2**). In Figure fig:Figure7, we illustrate the  
337 rank of validated microRNA-target pairs for each microRNA against the percentile. For MDI, there are  
338 90.70% (78/86) of the validated pairs locate in the top 50 percentile, which outperform Pearson correlation  
339 (63.95%,55/86). The three sequence-based prediction algorithms perform well, TargetScan 69.33% (52/75),  
340 miRanda 78.87% (56/71) and PicTar 74.19% (23/31). This suggests that acceptable prediction can already  
341 be achieved using only the overlap of sequence-based prediction software. Incorporating expression  
342 correlation can increase the accuracy of microRNA target prediction, but it is important to remove the  
343 transitive correlations. (In Figure fig:Figure8 we extract the reliable targets with greater MDI than the  
344 validated targets for each microRNA.)

## 4 DISCUSSION

345 Bioinformatics data analysis task always encounters sample size issue, especially for biomedical data,  
346 which suffer from pathogenic difference and sample heterogeneity. While the cost for high-throughput  
347 technology has decreased dramatically in recent years, the collection of extremely large samples is still  
348 luxury that few studies can afford. Integrating the huge amount of biological data readily available from  
349 public databases remains the best option. Several studies has proved the superiority of data integration,  
350 much attention has been paid on how to efficiently store and search useful knowledge from large expression  
351 compendium. However, the integration of these database is plagued by pathogenic difference and sample  
352 heterogeneity.

353 The genes do not act alone, they tend to be grouped together and with particular topological structure,  
354 we call it as pathway. The pathway relies on the interactions between genes, including causal and non-  
355 causal interactions. The causal interactions refer to regulatory interactions, the regulators or their products  
356 physically bind to those target genes' sequences to make their status changed. The non-causal interactions  
357 are a kind of indirect interactions, where the genes interact with each other through transitive ones.  
358 Intuitively, these genes may share similar functions. Several databases have collected many experimental  
359 validated interactions. But such data are usually incomplete and biased, for example only a small proportion  
360 of transcription factors targets are well studied. We require an approach that can explore the interactions  
361 from unstructured data based on their inherent activities.

362 Such large amount of gene expression data shed light on evaluating the gene-gene interactions, which  
363 can be detected by computing expression dependencies. On the other hand, it is an uneasy task because  
364 traditional methods are no longer appropriate for large expression collection. Previous findings suggest that  
365 gene expressions from multiple datasets follow a Gaussian mixture models. Inspired by this observation,  
366 we propose MMF, a framework that depicts the gene expression data by Gaussian mixtures. Each mode  
367 captures one type of "local features", which denotes noise or particular cellular status, hence allowing the  
368 heterogeneous data sets to be integrated naturally. Two measures, MMI and MDI, are defined over the  
369 framework to capture gene-gene co-expression and regulatory interactions, respectively. They outperform  
370 other measures in the simulation tests, and several real data benchmarks proved their practicality to detect  
371 important interactions or genes.

372 MIC is a comparable method that can detect novel associations in large datasets Reshef et al. (2011). It also  
373 considers the "local feature" to improve the accuracy and resist the noisy influence. Two major drawbacks  
374 prohibit MIC to be widely applied in large expression data. First, as an improvement of B-spline, MIC  
375 considers the best grid partition to calculate mutual information for gene pairs. But from our simulations,  
376 usually MIC cannot find the best choice for the data from Gaussian mixture models. In addition, MIC  
377 ignores the expression correlation within each grid, which makes the power decreased; second, MIC  
378 attempts the partition for every pair of genes, which introduce a huge computational burden. MMI explicitly  
379 solves these two problems and achieves better performance.

380 In the future, we plan to apply MMF to other types of continuous data and extend it to other underlying  
381 distributions such as Poisson distribution or Negative binomial distribution. We believe MMF can find  
382 wide application in discovering new interactions from integrated gene expression data, as well as help in  
383 furthering the analysis of big biomedical data.

## 5 CONCLUSION

384 The fast accumulation of high-throughput gene expression data provides us an unprecedented opportunity  
385 to understand the gene-gene interactions and prioritize the disease candidate genes. However, most of the  
386 previous approaches can not accurately depict gene expression profiles from large expression compendium  
387 due to considerable noise and heterogeneity between samples. We propose a new statistical measure  
388 Multimodal framework to model gene expressions with mixtures of Gaussian distributions, which is further  
389 extended to Multimodal Mutual information and Multimodal Direct information for calculating gene-gene  
390 co-expression and gene regulation, respectively. The practical use of MMF is further demonstrated in three  
391 biological applications: 1. Prioritizing KIF1A as the candidate causal gene of HSP from familial exome  
392 sequencing data; 2. Detecting ANK2 as the 'hot genes' for ASDs, derived from exome sequencing family  
393 based study; 3. Predicting the microRNA target genes based on both sequence and expression information.  
394 We believe MMF can be served as a general framework for discovering relationships within very massive  
395 biomedical datasets.

## CONFLICT OF INTEREST STATEMENT

396 The authors declare that they have no competing interests.

## AUTHOR CONTRIBUTIONS

397 SL supervised the work and together with LZ, developed MMF and procedure of experiment. LZ  
398 implemented the MMI method in matlab. LZ, JC did the experiments on simulation and real data. LZ and  
399 SL wrote the manuscript. All authors have read and approved the final manuscript.

## FUNDING

400 The work described in this paper was fully supported by a grant from the Research Grants Council of the  
401 Hong Kong Special Administrative Region, China (Project No. CityU 124512).

## ACKNOWLEDGMENTS

402 We would like to thank Yen Kaow Ng for informative discussions.

## SUPPLEMENTAL DATA

403 Supplementary Material The Supplementary Material for this article can be found online at: XXX

## REFERENCES

- 404 Barrett, T., Wilhite, S. E., Ledoux, P., Evangelista, C., Kim, I. F., Tomashevsky, M., et al. (2013). NCBI  
405 GEO: archive for functional genomics data sets–update. *Nucleic Acids Res.* 41, D991–995
- 406 Brunel, H., Gallardo-Chacon, J. J., Buil, A., Vallverdu, M., Soria, J. M., Caminal, P., et al. (2010). MISS: a  
407 non-linear methodology based on mutual information for genetic association studies in both population  
408 and sib-pairs analysis. *Bioinformatics* 26, 1811–1818
- 409 Butte, A. J. and Kohane, I. S. (2000). Mutual information relevance networks: functional genomic  
410 clustering using pairwise entropy measurements. *Pac Symp Biocomput* , 418–429
- 411 Daub, C. O., Steuer, R., Selbig, J., and Kloska, S. (2004). Estimating mutual information using B-spline  
412 functions—an improved similarity measure for analysing gene expression data. *BMC Bioinformatics* 5,  
413 118
- 414 De Rubeis, S., He, X., Goldberg, A. P., Poultney, C. S., Samocha, K., Cicek, A. E., et al. (2014). Synaptic,  
415 transcriptional and chromatin genes disrupted in autism. *Nature* 515, 209–215
- 416 Erlich, Y., Edvardson, S., Hodges, E., Zenvirt, S., Thekkat, P., Shaag, A., et al. (2011). Exome sequencing  
417 and disease-network analysis of a single family implicate a mutation in KIF1A in hereditary spastic  
418 paraparesis. *Genome Res*
- 419 Faith, J. J., Hayete, B., Thaden, J. T., Mogno, I., Wierzbowski, J., Cottarel, G., et al. (2007). Large-scale  
420 mapping and validation of Escherichia coli transcriptional regulation from a compendium of expression  
421 profiles. *PLoS Biol.* 5, e8
- 422 Fehrmann, R. S., Karjalainen, J. M., Krajewska, M., Westra, H. J., Maloney, D., Simeonov, A., et al. (2015).  
423 Gene expression analysis identifies global gene dosage sensitivity in cancer. *Nat. Genet.* 47, 115–125
- 424 Fromer, M., Pocklington, A. J., Kavanagh, D. H., Williams, H. J., Dwyer, S., Gormley, P., et al. (2014). De  
425 novo mutations in schizophrenia implicate synaptic networks. *Nature* 506, 179–184



- 426 Gennarino, V. A., D'Angelo, G., Dharmalingam, G., Fernandez, S., Russolillo, G., Sanges, R., et al. (2012).  
427 Identification of microRNA-regulated gene networks by expression analysis of target genes. *Genome*  
428 *Res.* 22, 1163–1172
- 429 Gennarino, V. A., Sardiello, M., Avellino, R., Meola, N., Maselli, V., Anand, S., et al. (2009). MicroRNA  
430 target prediction by expression analysis of host genes. *Genome Res.* 19, 481–490
- 431 Haury, A. C., Mordelet, F., Vera-Licona, P., and Vert, J. P. (2012). TIGRESS: Trustful Inference of Gene  
432 REgulation using Stability Selection. *BMC Syst Biol* 6, 145
- 433 He, X., Sanders, S. J., Liu, L., De Rubeis, S., Lim, E. T., Sutcliffe, J. S., et al. (2013). Integrated model  
434 of de novo and inherited genetic variants yields greater power to identify risk genes. *PLoS Genet.* 9,  
435 e1003671
- 436 Huttenhower, C., Hibbs, M., Myers, C., and Troyanskaya, O. G. (2006). A scalable method for integration  
437 and functional analysis of multiple microarray datasets. *Bioinformatics* 22, 2890–2897
- 438 Huynh-Thu, V. A., Irrthum, A., Wehenkel, L., and Geurts, P. (2010). Inferring regulatory networks from  
439 expression data using tree-based methods. *PLoS ONE* 5
- 440 Iossifov, I., O'Roak, B. J., Sanders, S. J., Ronemus, M., Krumm, N., Levy, D., et al. (2014). The  
441 contribution of de novo coding mutations to autism spectrum disorder. *Nature* 515, 216–221
- 442 John, B., Enright, A. J., Aravin, A., Tuschl, T., Sander, C., and Marks, D. S. (2004). Human MicroRNA  
443 targets. *PLoS Biol.* 2, e363
- 444 Kim, M., Cho, S. B., and Kim, J. H. (2010). Mixture-model based estimation of gene expression variance  
445 from public database improves identification of differentially expressed genes in small sized microarray  
446 data. *Bioinformatics* 26, 486–492
- 447 Kolesnikov, N., Hastings, E., Keays, M., Melnichuk, O., Tang, Y. A., Williams, E., et al. (2015).  
448 ArrayExpress update—simplifying data submissions. *Nucleic Acids Res.* 43, D1113–1116
- 449 Kordeli, E. and Bennett, V. (1991). Distinct ankyrin isoforms at neuron cell bodies and nodes of Ranvier  
450 resolved using erythrocyte ankyrin-deficient mice. *J. Cell Biol.* 114, 1243–1259
- 451 Krek, A., Grun, D., Poy, M. N., Wolf, R., Rosenberg, L., Epstein, E. J., et al. (2005). Combinatorial  
452 microRNA target predictions. *Nat. Genet.* 37, 495–500
- 453 Lee, H. K., Hsu, A. K., Sajdak, J., Qin, J., and Pavlidis, P. (2004). Coexpression analysis of human genes  
454 across many microarray data sets. *Genome Res.* 14, 1085–1094
- 455 Lewis, B. P., Burge, C. B., and Bartel, D. P. (2005). Conserved seed pairing, often flanked by adenosines,  
456 indicates that thousands of human genes are microRNA targets. *Cell* 120, 15–20
- 457 Lezon, T. R., Banavar, J. R., Cieplak, M., Maritan, A., and Fedoroff, N. V. (2006). Using the principle of  
458 entropy maximization to infer genetic interaction networks from gene expression patterns. *Proc. Natl.*  
459 *Acad. Sci. U.S.A.* 103, 19033–19038
- 460 Li, Y. and Xie, X. (2013). A mixture model for expression deconvolution from RNA-seq in heterogeneous  
461 tissues. *BMC Bioinformatics* 14 Suppl 5, S11
- 462 Luo, W., Hankenson, K. D., and Woolf, P. J. (2008). Learning transcriptional regulatory networks from high  
463 throughput gene expression data using continuous three-way mutual information. *BMC Bioinformatics*  
464 9, 467
- 465 Malone, I. B., Cash, D., Ridgway, G. R., MacManus, D. G., Ourselin, S., Fox, N. C., et al. (2013).  
466 MIRIAD—Public release of a multiple time point Alzheimer's MR imaging dataset. *Neuroimage* 70,  
467 33–36
- 468 Margolin, A. A., Nemenman, I., Basso, K., Wiggins, C., Stolovitzky, G., Dalla Favera, R., et al. (2006).  
469 ARACNE: an algorithm for the reconstruction of gene regulatory networks in a mammalian cellular  
470 context. *BMC Bioinformatics* 7 Suppl 1, S7



- 471 Meyer, P. E., Lafitte, F., and Bontempi, G. (2008). minet: A R/Bioconductor package for inferring large  
472 transcriptional networks using mutual information. *BMC Bioinformatics* 9, 461
- 473 Morcos, F., Pagnani, A., Lunt, B., Bertolino, A., Marks, D. S., Sander, C., et al. (2011). Direct-coupling  
474 analysis of residue coevolution captures native contacts across many protein families. *Proc. Natl. Acad.  
475 Sci. U.S.A.* 108, E1293–1301
- 476 Navin, N., Kendall, J., Troge, J., Andrews, P., Rodgers, L., McIndoo, J., et al. (2011). Tumour evolution  
477 inferred by single-cell sequencing. *Nature* 472, 90–94
- 478 Reshef, D. N., Reshef, Y. A., Finucane, H. K., Grossman, S. R., McVean, G., Turnbaugh, P. J., et al. (2011).  
479 Detecting novel associations in large data sets. *Science* 334, 1518–1524
- 480 SIMON, N. and TIBSHIRANI, R. (2012). COMMENT ON "DETECTING NOVEL ASSOCIATIONS IN  
481 LARGE DATA SETS" BY RESHEF ET AL, SCIENCE DEC 16, 2011 [arXiv:1401.7645]
- 482 Subramanian, A., Tamayo, P., Mootha, V. K., Mukherjee, S., Ebert, B. L., Gillette, M. A., et al. (2005).  
483 Gene set enrichment analysis: a knowledge-based approach for interpreting genome-wide expression  
484 profiles. *Proc. Natl. Acad. Sci. U.S.A.* 102, 15545–15550
- 485 van Dam, S., Craig, T., and de Magalhaes, J. P. (2015). GeneFriends: a human RNA-seq-based gene and  
486 transcript co-expression database. *Nucleic Acids Res.* 43, D1124–1132
- 487 Wang, Y. X., Waterman, M. S., and Huang, H. (2014). Gene coexpression measures in large heterogeneous  
488 samples using count statistics. *Proc. Natl. Acad. Sci. U.S.A.* 111, 16371–16376
- 489 Willsey, A. J., Sanders, S. J., Li, M., Dong, S., Tebbenkamp, A. T., Muhle, R. A., et al. (2013). Coexpression  
490 networks implicate human midfetal deep cortical projection neurons in the pathogenesis of autism. *Cell*  
491 155, 997–1007

**Table 1.** Simulation result for 10 nodes tree by comparing MDI with other methods in terms of AUC.

(a) Simulation without any noise

|     | ARACNE   | CLR      | GENIE3 | MaxEnt | TIGRESS | MDI         |
|-----|----------|----------|--------|--------|---------|-------------|
| 0.1 | 0.64     | 0.79     | 0.57   | 0.58   | 0.53    | <b>0.81</b> |
| 0.2 | 0.92     | 0.97     | 0.68   | 0.73   | 0.60    | <b>1</b>    |
| 0.4 | <b>1</b> | <b>1</b> | 0.89   | 0.76   | 0.71    | <b>1</b>    |
| 0.6 | <b>1</b> | <b>1</b> | 0.92   | 0.47   | 0.56    | <b>1</b>    |
| 0.8 | <b>1</b> | <b>1</b> | 0.84   | 0.68   | 0.55    | <b>1</b>    |

(b) Simulation with 3/5 random noise

|     | ARACNE   | CLR      | GENIE3 | MaxEnt | TIGRESS | MDI         |
|-----|----------|----------|--------|--------|---------|-------------|
| 0.1 | 0.64     | 0.64     | 0.59   | 0.61   | 0.53    | <b>0.75</b> |
| 0.2 | 0.88     | 0.88     | 0.54   | 0.70   | 0.58    | <b>1</b>    |
| 0.4 | 0.96     | <b>1</b> | 0.72   | 0.77   | 0.7289  | <b>1</b>    |
| 0.6 | 0.89     | <b>1</b> | 0.83   | 0.49   | 0.5643  | <b>1</b>    |
| 0.8 | <b>1</b> | <b>1</b> | 0.66   | 0.6543 | 0.5643  | <b>1</b>    |

(c) Simulation with 6/5 random noise

|     | ARACNE      | CLR         | GENIE3 | MaxEnt | TIGRESS | MDI         |
|-----|-------------|-------------|--------|--------|---------|-------------|
| 0.1 | <b>0.63</b> | 0.40        | 0.46   | 0.61   | 0.56    | 0.46        |
| 0.2 | 0.60        | 0.71        | 0.50   | 0.67   | 0.54    | <b>0.87</b> |
| 0.4 | 0.85        | <b>1</b>    | 0.80   | 0.58   | 0.65    | <b>1</b>    |
| 0.6 | 0.79        | <b>0.99</b> | 0.71   | 0.53   | 0.57    | <b>0.99</b> |
| 0.8 | 0.94        | 0.97        | 0.73   | 0.65   | 0.55    | <b>0.98</b> |

**Table 2.** Simulation result for 20 nodes tree by comparing MDI with other methods in terms of AUC.

(a) Simulation without any noise

|     | ARACNE   | CLR      | GENIE3 | MaxEnt | TIGRESS | MDI         |
|-----|----------|----------|--------|--------|---------|-------------|
| 0.1 | 0.69     | 0.74     | 0.4541 | 0.47   | 0.49    | <b>0.87</b> |
| 0.2 | 0.89     | 0.98     | 0.52   | 0.42   | 0.44    | <b>1</b>    |
| 0.4 | <b>1</b> | <b>1</b> | 0.87   | 0.61   | 0.65    | <b>1</b>    |
| 0.6 | <b>1</b> | <b>1</b> | 0.90   | 0.57   | 0.54    | <b>1</b>    |
| 0.8 | <b>1</b> | <b>1</b> | 0.93   | 0.64   | 0.61    | <b>1</b>    |

(b) Simulation with 3/5 random noise

|     | ARACNE   | CLR      | GENIE3 | MaxEnt | TIGRESS | MDI         |
|-----|----------|----------|--------|--------|---------|-------------|
| 0.1 | 0.52     | 0.53     | 0.35   | 0.47   | 0.50    | <b>0.73</b> |
| 0.2 | 0.87     | 0.93     | 0.56   | 0.43   | 0.45    | <b>1</b>    |
| 0.4 | <b>1</b> | <b>1</b> | 0.77   | 0.61   | 0.62    | <b>1</b>    |
| 0.6 | <b>1</b> | <b>1</b> | 0.83   | 0.55   | 0.54    | <b>1</b>    |
| 0.8 | 0.98     | <b>1</b> | 0.85   | 0.60   | 0.59    | <b>1</b>    |

(c) Simulation with 6/5 random noise

|     | ARACNE | CLR         | GENIE3 | MaxEnt | TIGRESS | MDI         |
|-----|--------|-------------|--------|--------|---------|-------------|
| 0.1 | 0.53   | 0.61        | 0.47   | 0.50   | 0.49    | <b>0.69</b> |
| 0.2 | 0.59   | 0.67        | 0.5324 | 0.50   | 0.48    | <b>0.86</b> |
| 0.4 | 0.78   | 0.87        | 0.6340 | 0.61   | 0.66    | <b>0.99</b> |
| 0.6 | 0.97   | <b>0.99</b> | 0.65   | 0.49   | 0.47    | <b>0.99</b> |
| 0.8 | 0.88   | <b>0.99</b> | 0.75   | 0.64   | 0.57    | 0.98        |

**Table 3.** Simulation result for 50 nodes tree by comparing MDI with other methods in terms of AUC.

(a) Simulation without any noise

|     | ARACNE   | CLR      | GENIE3 | MaxEnt | TIGRESS | MDI         |
|-----|----------|----------|--------|--------|---------|-------------|
| 0.1 | 0.53     | 0.79     | 0.54   | 0.49   | 0.53    | <b>0.94</b> |
| 0.2 | 0.93     | <b>1</b> | 0.62   | 0.52   | 0.53    | <b>1</b>    |
| 0.4 | <b>1</b> | <b>1</b> | 0.85   | 0.61   | 0.56    | <b>1</b>    |
| 0.6 | <b>1</b> | <b>1</b> | 0.95   | 0.61   | 0.57    | <b>1</b>    |
| 0.8 | <b>1</b> | <b>1</b> | 0.95   | 0.56   | 0.57    | <b>1</b>    |

(b) Simulation with 3/5 random noise

|     | ARACNE   | CLR      | GENIE3 | MaxEnt | TIGRESS | MDI         |
|-----|----------|----------|--------|--------|---------|-------------|
| 0.1 | 0.50     | 0.63     | 0.50   | 0.48   | 0.50    | <b>0.83</b> |
| 0.2 | 0.80     | 0.94     | 0.60   | 0.5279 | 0.51    | <b>1</b>    |
| 0.4 | 0.99     | <b>1</b> | 0.78   | 0.63   | 0.58    | <b>1</b>    |
| 0.6 | <b>1</b> | <b>1</b> | 0.88   | 0.62   | 0.60    | <b>1</b>    |
| 0.8 | <b>1</b> | 0.99     | 0.87   | 0.55   | 0.54    | <b>1</b>    |

(c) Simulation with 6/5 random noise

|     | ARACNE | CLR  | GENIE3 | MaxEnt | TIGRESS | MDI         |
|-----|--------|------|--------|--------|---------|-------------|
| 0.1 | 0.48   | 0.52 | 0.51   | 0.46   | 0.50    | <b>0.64</b> |
| 0.2 | 0.55   | 0.64 | 0.49   | 0.47   | 0.50    | <b>0.86</b> |
| 0.4 | 0.82   | 0.90 | 0.64   | 0.57   | 0.55    | <b>1</b>    |
| 0.6 | 0.96   | 0.99 | 0.75   | 0.60   | 0.57    | <b>1</b>    |
| 0.8 | 0.97   | 0.99 | 0.84   | 0.60   | 0.59    | <b>1</b>    |

**Table 4.** Simulation result for 100 nodes tree by comparing MDI with other methods in terms of AUC.

(a) Simulation without any noise

|     | ARACNE   | CLR      | GENIE3 | MaxEnt | TIGRESS | MDI         |
|-----|----------|----------|--------|--------|---------|-------------|
| 0.1 | 0.66     | 0.74     | 0.54   | 0.53   | 0.54    | <b>0.91</b> |
| 0.2 | 0.90     | <b>1</b> | 0.64   | 0.60   | 0.54    | <b>1</b>    |
| 0.4 | <b>1</b> | <b>1</b> | 0.82   | 0.54   | 0.54    | <b>1</b>    |
| 0.6 | <b>1</b> | <b>1</b> | 0.96   | 0.60   | 0.58    | <b>1</b>    |
| 0.8 | <b>1</b> | <b>1</b> | 0.97   | 0.56   | 0.55    | <b>1</b>    |

(b) Simulation with 3/5 random noise

|     | ARACNE   | CLR      | GENIE3 | MaxEnt | TIGRESS | MDI         |
|-----|----------|----------|--------|--------|---------|-------------|
| 0.1 | 0.56     | 0.66     | 0.56   | 0.52   | 0.52    | <b>0.80</b> |
| 0.2 | 0.86     | 0.92     | 0.60   | 0.58   | 0.52    | <b>0.98</b> |
| 0.4 | <b>1</b> | <b>1</b> | 0.74   | 0.54   | 0.53    | <b>1</b>    |
| 0.6 | <b>1</b> | <b>1</b> | 0.92   | 0.60   | 0.57    | <b>1</b>    |
| 0.8 | <b>1</b> | <b>1</b> | 0.93   | 0.54   | 0.56    | <b>1</b>    |

(c) Simulation with 6/5 random noise

|     | ARACNE | CLR      | GENIE3 | MaxEnt | TIGRESS | MDI         |
|-----|--------|----------|--------|--------|---------|-------------|
| 0.1 | 0.62   | 0.56     | 0.55   | 0.52   | 0.52    | <b>0.63</b> |
| 0.2 | 0.63   | 0.65     | 0.56   | 0.57   | 0.53    | <b>0.82</b> |
| 0.4 | 0.76   | 0.93     | 0.63   | 0.52   | 0.51    | <b>0.99</b> |
| 0.6 | 0.97   | <b>1</b> | 0.79   | 0.58   | 0.56    | <b>1</b>    |
| 0.8 | 0.96   | <b>1</b> | 0.81   | 0.56   | 0.57    | 0.99        |

**Table 5.** Simulation result for 200 nodes tree by comparing MDI with other methods in terms of AUC.

(a) Simulation without any noise

|     | ARACNE   | CLR      | GENIE3 | MaxEnt | TIGRESS | MDI         |
|-----|----------|----------|--------|--------|---------|-------------|
| 0.1 | 0.6432   | 0.7172   | 0.5277 | 0.49   | 0.50    | <b>0.83</b> |
| 0.2 | 0.8780   | 0.9732   | 0.6040 | 0.51   | 0.49    | <b>1</b>    |
| 0.4 | <b>1</b> | <b>1</b> | 0.84   | 0.59   | 0.57    | <b>1</b>    |
| 0.6 | <b>1</b> | <b>1</b> | 0.97   | 0.61   | 0.62    | <b>1</b>    |
| 0.8 | <b>1</b> | <b>1</b> | 0.98   | 0.59   | 0.63    | <b>1</b>    |

(b) Simulation with 3/5 random noise

|     | ARACNE   | CLR      | GENIE3 | MaxEnt | TIGRESS | MDI         |
|-----|----------|----------|--------|--------|---------|-------------|
| 0.1 | 0.56     | 0.63     | 0.53   | 0.4901 | 0.51    | <b>0.75</b> |
| 0.2 | 0.71     | 0.89     | 0.56   | 0.52   | 0.51    | <b>0.97</b> |
| 0.4 | 0.99     | <b>1</b> | 0.75   | 0.60   | 0.56    | <b>1</b>    |
| 0.6 | <b>1</b> | 0.91     | 0.98   | 0.61   | 0.60    | <b>1</b>    |
| 0.8 | <b>1</b> | <b>1</b> | 0.94   | 0.59   | 0.63    | 0.96        |

(c) Simulation with 6/5 random noise

|     | ARACNE | CLR         | GENIE3 | MaxEnt | TIGRESS | MDI         |
|-----|--------|-------------|--------|--------|---------|-------------|
| 0.1 | 0.50   | <b>0.51</b> | 0.49   | 0.48   | 0.49    | 0.49        |
| 0.2 | 0.54   | 0.52        | 0.51   | 0.53   | 0.49    | <b>0.59</b> |
| 0.4 | 0.58   | 0.66        | 0.61   | 0.54   | 0.55    | <b>0.74</b> |
| 0.6 | 0.68   | 0.78        | 0.66   | 0.58   | 0.60    | <b>0.86</b> |
| 0.8 | 0.83   | 0.90        | 0.72   | 0.58   | 0.61    | <b>0.90</b> |

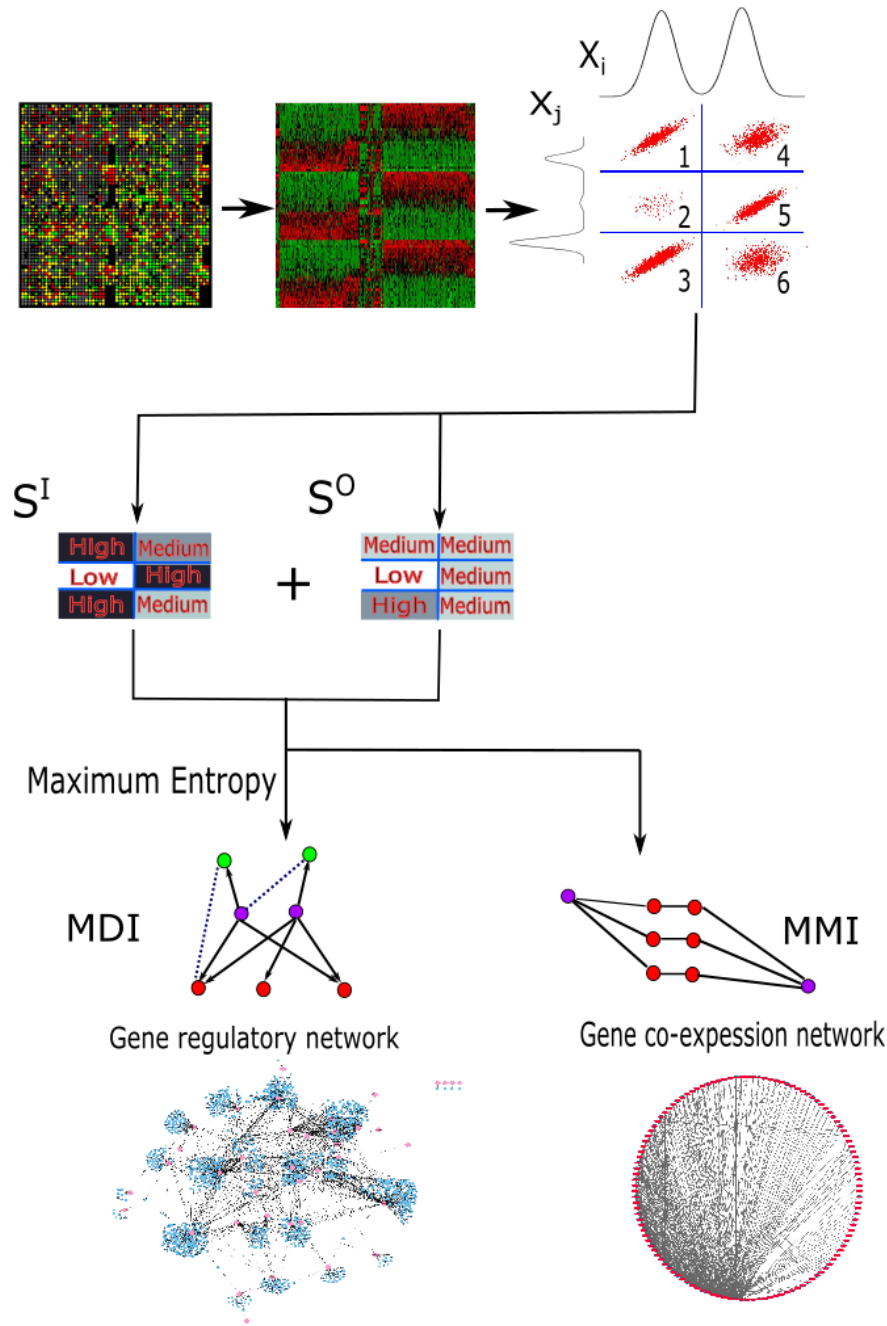

**Figure 1.** The procedure and purpose for MMI and MDI under Multimodal framework. Two genes  $X_i$  and  $X_j$  come from Gaussian Mixture models with two and three modes, respectively. The samples are divided into six bins as the Cartesian product of the clusters for  $X_i$  and  $X_j$ . The expression profiles are highly co-expressed in the 1st, 3rd and 5th bins. The 4th and 6th bins are marginally correlated. There are only a few samples in the 2nd bin with weak correlation. The  $S^I$  and  $S^O$  are calculated with deeper color demonstrating stronger covariance. MMI calculates the co-expression between gene pairs (purple circles), regardless whether there are transitive nodes (red circles) between them. MDI captures the regulatory interactions (arrows present regulation directions), the transitive interactions are eliminated (dashed lines).



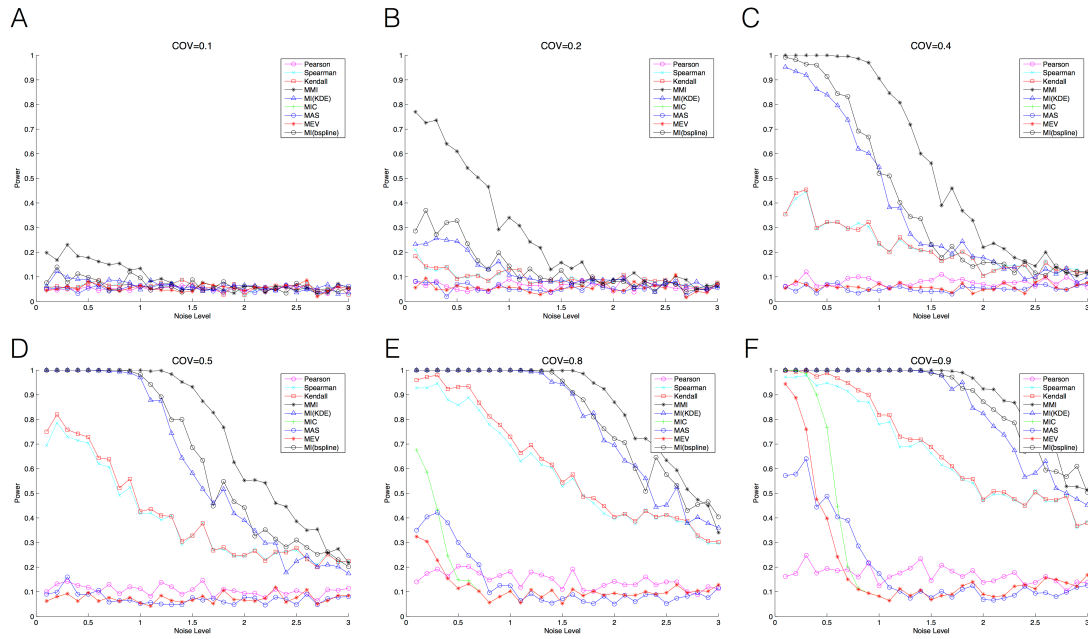

**Figure 2.** Power and noise tolerance comparing MMI with other methods in simulation data. Simulation Data are sampled from bivariate Gaussian mixture models with different covariances. We add different amount of noise in the simulation data. (A) Covariance=0.1, (B) Covariance=0.2, (C) Covariance=0.4, (D) Covariance=0.5, (E) Covariance=0.8, (F) Covariance=0.9.

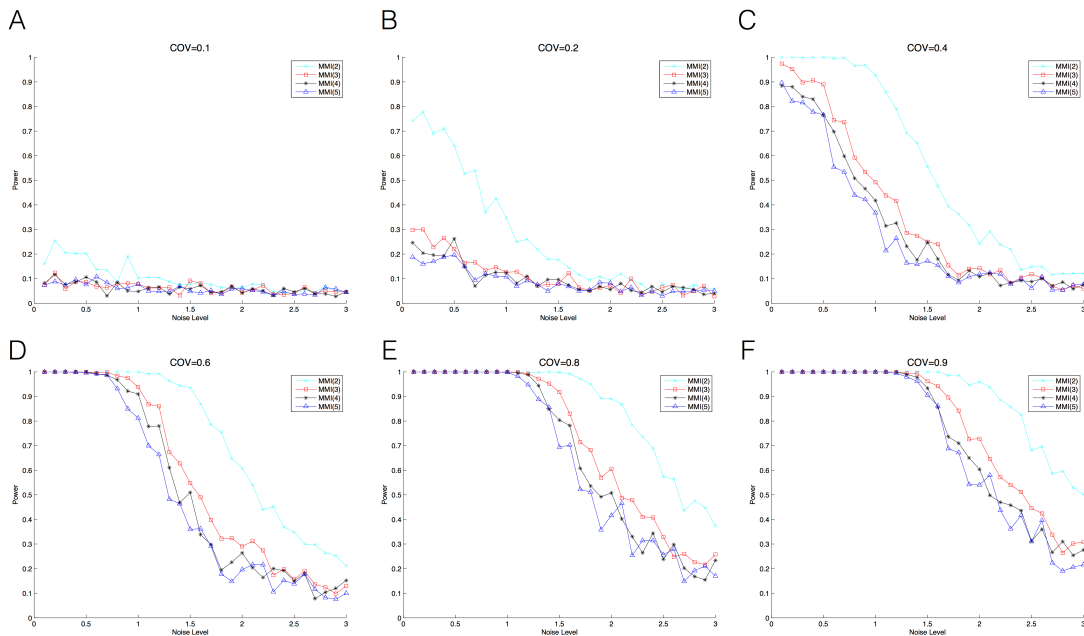

**Figure 3.** Power and noise tolerance for MMI by assigning different number of modes. The numbers in brackets denote the number of modes. (A) Covariance=0.1, (B) Covariance=0.2, (C) Covariance=0.4, (D) Covariance=0.6, (E) Covariance=0.8, (F) Covariance=0.9.

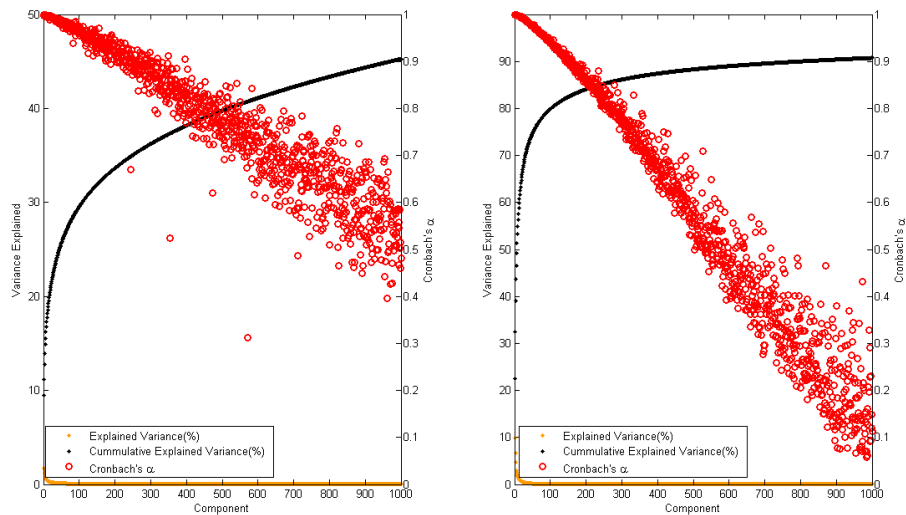

**Figure 4.** Covariance explained by eigenvalues and their Cronbach's  $\alpha$  values. (**Left:** MMI, **Right:** Pearson correlation). We choose top 1000 principle components to calculate the variance they explained and their stability.

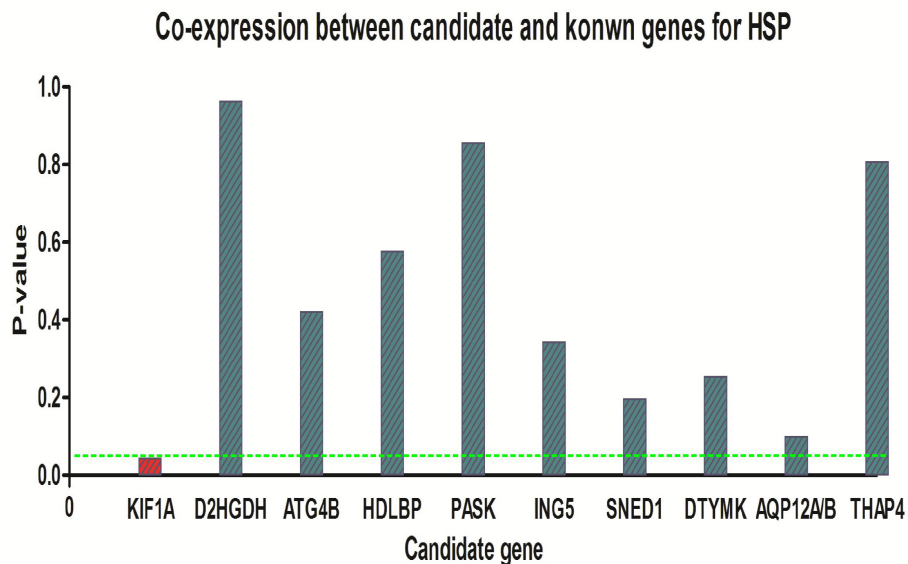

**Figure 5.** The P-values calculated by their average co-expression with known genes of pure HSP after 10,000 times simulation. The co-expression values are calculated by MMI. KIF1A, the real disease causal gene, is the only significant one comparing with other 10 candidate genes. The green dashed line represents the P-value=0.05.

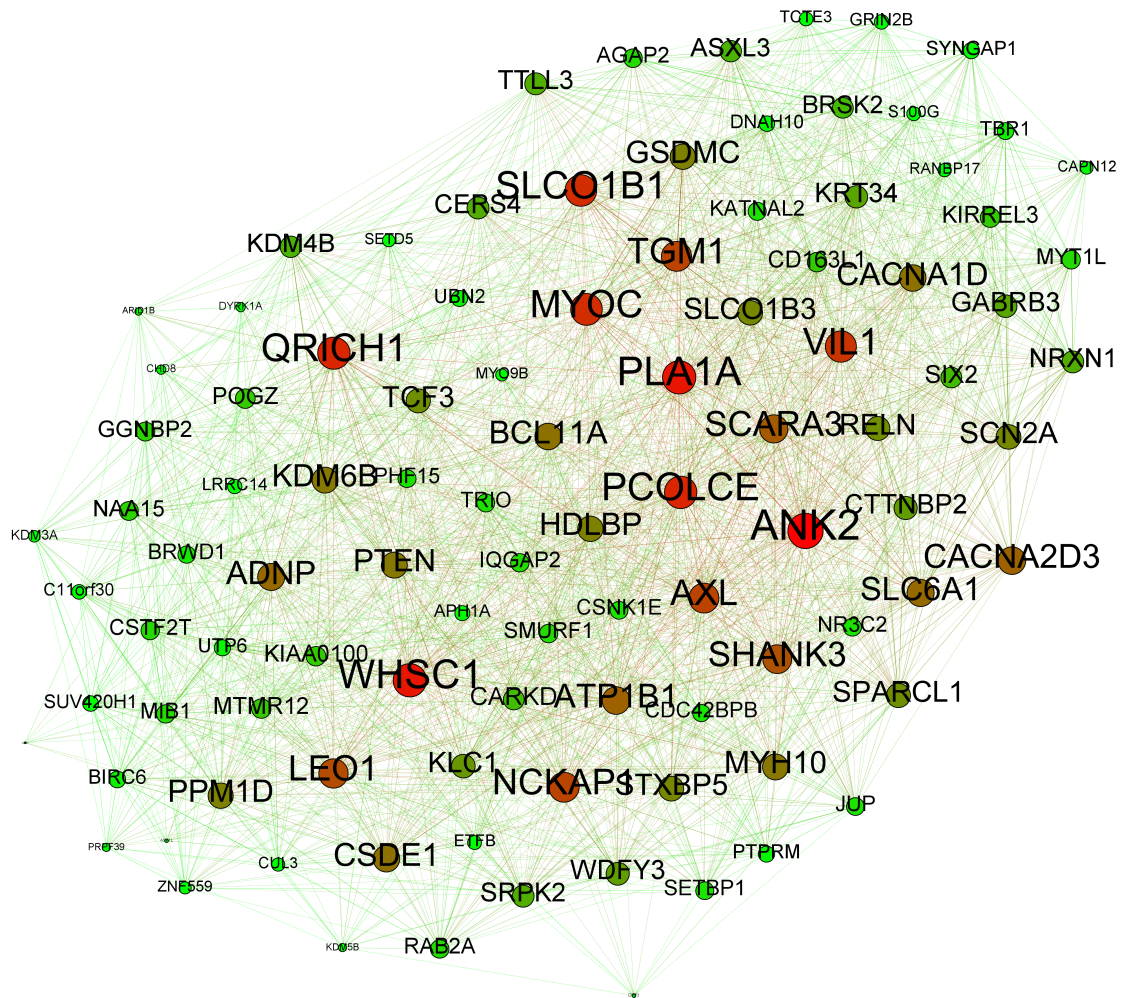

**Figure 6.** The ‘hot gene’ calculated by the weighted connective degree for each candidate genes. The size and color of nodes represent their weighted connective degree and expression level, respectively.

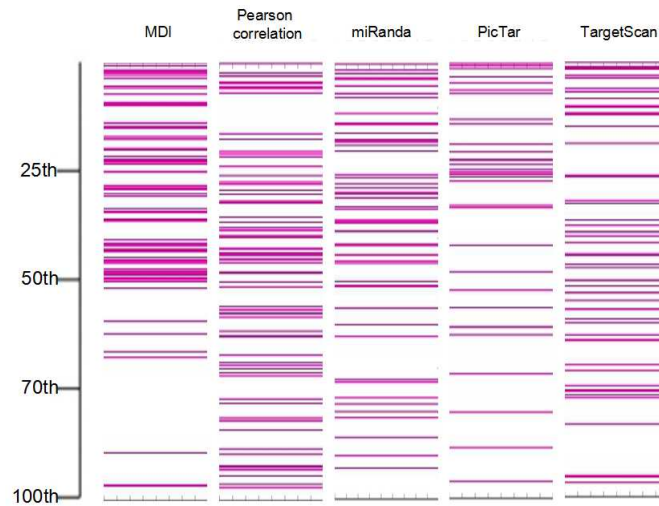

**Figure 7.** The performance of MDI to recognize previous validated microRNA targets. MDI is compared with Pearson correlation and three sequence based target prediction approaches (miRanda, PicTar, TargetScan), respectively. The ranks of validated targets (pink line) are demonstrated as the percentile among the all predicted results for each microRNA.



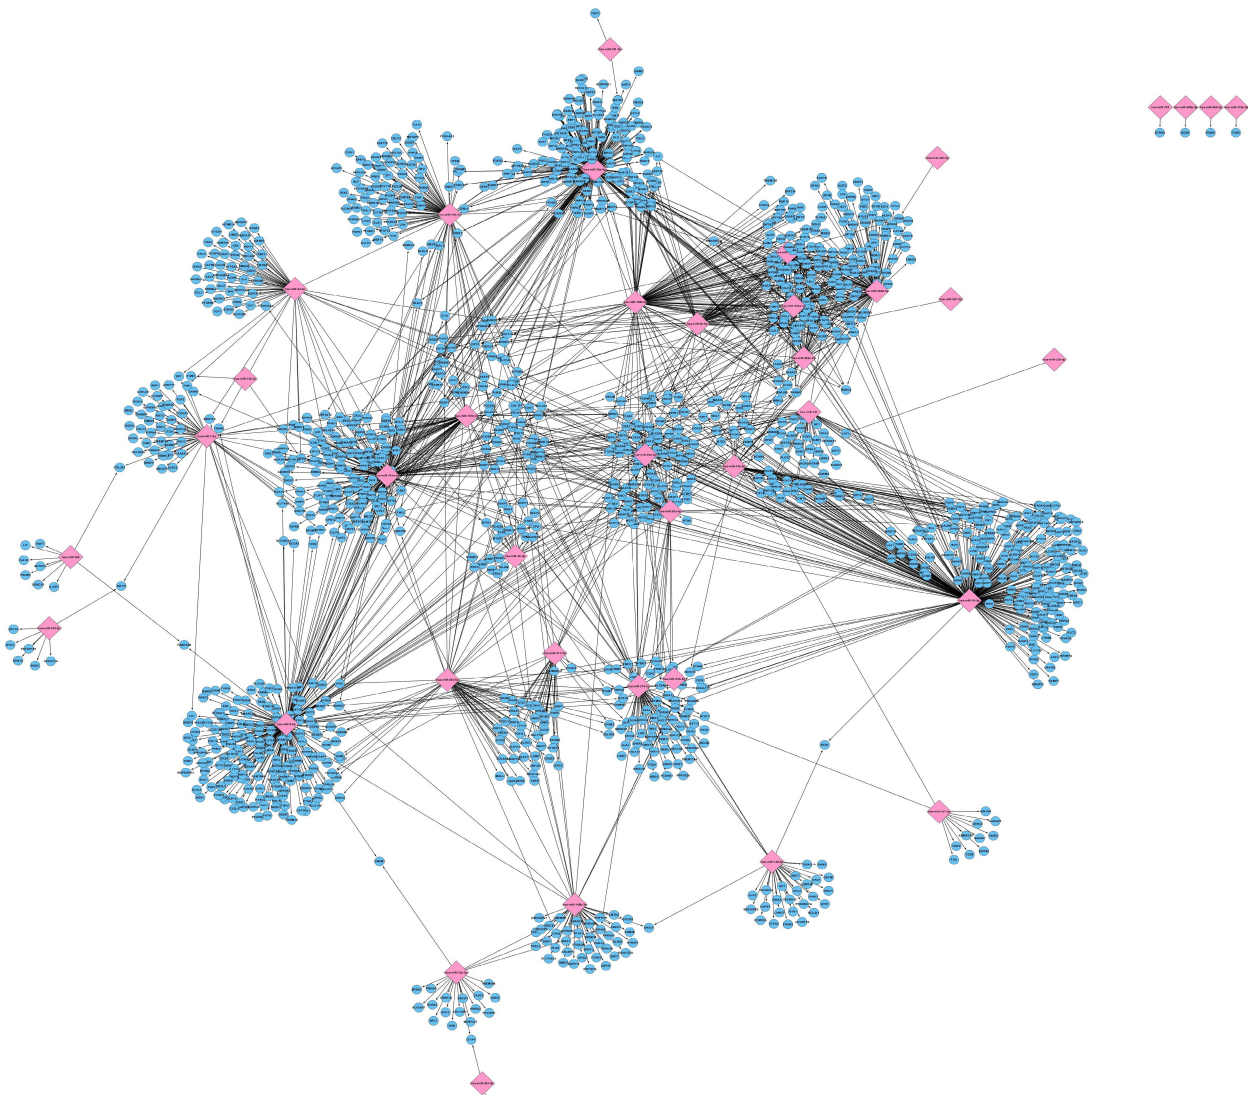

**Figure 8.** The microRNA regulatory network predicted by MDI. For each microRNA, we plot all the predicted targets with greater MDI than the validated ones. The pink diamonds and blue circles present microRNAs and their targets, respectively.
